# Supplementary material for: EVOLUTIONARY CO-OPTION OF AN ANCESTRAL CLOACAL REGULATORY LANDSCAPE DURING THE EMERGENCE OF DIGITS AND GENITALS
Source: PubMed Central journal article supplement — bioRxiv. 2024 Mar 27:2024.03.24.586442. Preprint. [Version 1] doi: 10.1101/2024.03.24.586442 (PMC10996561; doi:10.1101/2024.03.24.586442), 2024-03-27
Supplement: NIHPP2024.03.24.586442V1-supplement-1.pdf [file NIHPP2024.03.24.586442V1-supplement-1.pdf]

## 413 LEGENDS TO SUPPLEMENTARY FIGURES

414 **Figure S1. Comparison of *HoxD* regulatory landscapes in mammals and fishes.** **a.** *Hoxd* gene  
415 expression and regulation in mouse limb buds at E12.5. The *HoxD* cluster is flanked by two gene  
416 deserts, named according to their relative position (3' or 5') with respect to *Hoxd* gene orientation. The  
417 3DOM regulatory landscape activates *Hoxd4* to *Hoxd11* in the proximal limb territory (green). The  
418 5DOM activates *Hoxd10* to *Hoxd13* in the distal limb territory (blue). Schemes are based on ref.<sup>15</sup>. **b.**  
419 Gene expression in fin buds at 40-60 hpf in the cognate zebrafish *hoxda* cluster. The fish cluster is also  
420 flanked by two gene deserts but their regulatory potentials are unknown (question marks). Fish *hoxd9a*  
421 to *hoxd11a* are expressed in the preaxial fin territory (purple) whereas *hoxd11a* to *hoxd13a* are  
422 expressed in a postaxial domain (orange). Schemes and WISH are inspired from<sup>14,53,54</sup>.  
423

424 **Figure S2. 3D chromatin conformation at the mouse and fish *HoxD* loci.** Contact frequency  
425 heatmaps at the mouse *HoxD* (E18.5 male UGS, one representative replicate out of two) and fish *hoxda*  
426 (24 hpf and 48 hpf total embryos<sup>41,55</sup>) loci (top and bottom, respectively). The similarities in the  
427 constitutive structural organization of the mouse and the fish loci are underlined either by the position  
428 and relative extents of TADs (thick black lines), the presence of a sub-TAD boundary within 3DOM  
429 (asterisk), as well as by the positions and orientation of CTCF binding sites (red and blue arrowheads).  
430 *Hox* genes are in purple-scale rectangles and other genes are grey rectangles. Bin size is 10 kb. The  
431 scales on the *x* axes were adjusted to comparable sizes for ease of comparison, yet the fish locus is more  
432 compact. Scale bars in both cases; 100 kb.

433  
434 **Figure S3. The *HoxD* locus is part of a large syntenic interval.** **a.** The mouse *HoxD* locus (mm39)  
435 is on top and the zebrafish *hoxda* locus (danRer11) is shown below. *Hox* genes are in purple-scale  
436 rectangles and annotated mouse enhancers are shown as either blue (5DOM) or green (3DOM)  
437 rectangles. Conserved sequences between the two gene deserts are shown as vertical black bars. Those  
438 conserved sequences overlapping with known murine enhancers were used to annotate the  
439 corresponding elements in zebrafish (blue rectangles). **b.** Synteny plot representing sequences  
440 conserved between the mouse and the zebrafish *HoxD* loci. On the *x* axis is the mouse locus (mm10,  
441 chr2: 73605690-75662521) and on the *y* axis is the zebrafish locus (danRer11, chr9: 1639965-2393397,  
442 inverted *y* axis). Despite a mouse locus that is in average 2.6 times larger than its zebrafish counterpart,  
443 the order of most conserved sequences is maintained, showing the absence of substantial genomic  
444 rearrangement at these gene deserts. **c.** Size comparisons between different regions of the zebrafish  
445 *hoxda* and the mouse *HoxD* loci. The left panel shows that the *Hox* clusters have maintained a similar  
446 size over time, while gene deserts have expanded in mouse and/or contracted in zebrafish. The right  
447 panel shows that the ratio between the sizes of 5DOM *versus* 3DOM is inverted in the two species.

448

449 **Figure S4. Chromatin profiles in zebrafish embryos. a.** Expression of *hoxd13a*, *hoxd10a* and *hoxd4a*  
450 in control zebrafish embryos by WISH. Stages are indicated on top of the panels. Scale bars; 200  $\mu$ m.  
451 **b.** Dissection plan used for panel (c). PT, posterior trunk. **c.** ATAC-seq profile and both H3K27ac and  
452 H3K27me3 CUT&RUN profiles over the zebrafish *hoxda* locus in 16 hpf dissected heads (grey, one  
453 representative condition out of three) and 16 hpf posterior trunk cells (PT, blue, one representative  
454 replicate out of three). Both the *hoxda* cluster and 3DOM show specific open sites in posterior trunk,  
455 where *hoxda* genes are expressed, when compared to forebrain. The CUT&RUN profiles in posterior  
456 trunk cells show enrichment for H3K27ac (green coverage) on the central and anterior parts of the  
457 *hoxda* cluster, while H3K27me3 (red coverage) is enriched on the posterior part and on *evx2*. Scale bar;  
458 100 kb.

459

460 **Figure S5. *Hoxd13a* expression in control, heterozygous and homozygous mutant fin buds at 60**  
461 **and 72 hpf. a.** Schematic of the deletion and spatial orientation of the fin buds. **b.** Various samples are  
462 shown to illustrate the variability observed. While a clear tendency is observed in the loss of the distal  
463 most expression in homozygous mutants, expression is still observed in some samples as well as in  
464 post-axial cells, unlike the situation in developing limb buds where expression is entirely absent in the  
465 comparable deletion. Scale bar: 50  $\mu$ m.

466

467 **Figure S6. WISH of *hoxd13a*, *hoxd10a* or *hoxd4a* in zebrafish embryos lacking either 3DOM (a),**  
468 **or 5DOM (b).** The genotypes (in red, top) and genes analyzed (left) are shown as well as the stages (up  
469 left). **a.** Deletion of 3DOM. Black arrowheads (empty for no expression and full for expression) indicate  
470 differential gene expression in the cloacal region, whereas red arrowheads (empty for no expression  
471 and full for expression) point to the pectoral fin buds. Control and homozygote mutant embryos are  
472 shown side by side for each condition, except for *hoxd4a* where a heterozygous (Het) mutant is shown.  
473 Wild-type and homozygous embryos originate from the same clutch of eggs and were processed  
474 together. In Del(3DOM) mutant embryos (**a**), *Hoxd10a* and *hoxd4a* transcription is lost in fin buds,  
475 whereas *hoxd13a* transcripts in the cloaca are not affected. B, branchial arches; R, rhombomeres; Scale  
476 bars; 200  $\mu$ m. **b.** In contrast, *hoxd13a* mRNAs are lost from the cloacal region in Del(5DOM) mutant  
477 animals at 36 hpf (red arrowheads), while still clearly detected in the fin buds, indicating that the 5DOM  
478 is necessary for *hoxd13a* transcription in the pseudo-cloacal region.

479

480 **Figure S7. *Hoxd* gene expression in the mouse urogenital system. a.** Schematic representations of  
481 male and female urogenital systems. K: Kidney, B: Bladder, O: Ovary, T: Testis. The urogenital sinus  
482 (UGS) is indicated with a red circle. **b.** WISH of *Hoxd* genes in representative female and male  
483 urogenital systems. All *Hoxd* genes are expressed in anterior portions of the UGS including kidneys,  
484 the uterus, deferens ducts and the bladder, except *Hoxd13* transcripts, which are restricted to the UGS

485 (see Fig. 3b). **c-d.** Schematic representation of two *HoxD* genomic configurations, The first one is a  
486 deletion of the entire *HoxD* cluster (**c**), whereas the second one is a random integration of a transgene  
487 carrying the same *HoxD* transgene plus some flanking sequences in 5' (**d**, thick red bar). *Hox* genes as  
488 in shades of purple and the deletion breakpoints are shown as vertical dashed red lines. Scale bar; 100  
489 kb. **c.** WISH of *Hoxd13* in UGS from a transgenic *HoxD* cluster (TgBAC), while lacking both  
490 endogenous copies of the *HoxD* cluster. Expression is not detected from the transgenic cluster. **d.**  
491 Likewise,  $\beta$ -gal staining of UGS transgenic for the *HoxD* cluster containing a *LacZ* reporter displays no  
492 activity in the UGS. By contrast, *LacZ* staining of mutant *Inv(nsi-Itga6)d11lac* embryos, which also  
493 includes a *lacZ* reporter confirms that 5DOM is necessary and sufficient to drive expression in the UGS.  
494 Scale bar: 1 mm.

495  
496 **Figure S8. Regulatory potential of sub-regions within 5DOM.** **a.** RNA-seq FPKM values for various  
497 mouse *Hoxd* genes in E18.5 UGS obtained from either wild-type or *Inv(nsi-Itga6)d11lac* mutant  
498 embryos (see schematic in Fig. 3c). Data are shown separately for females (n=3, dots) and males (n=3,  
499 triangles). Drastic decreases are observed for *Hoxd10*, *Hoxd12* and *Hoxd13* when 5DOM is  
500 disconnected from the *HoxD* cluster. *Hoxd11* could not be assessed due to the presence of a transgenic  
501 copy of this gene in the *LacZ* reporter cassette. **b.** On top is a scheme of the 5DOM regulatory landscape  
502 on mm39 with *Hox* genes in purple. Blue rectangles indicate previously described 5DOM enhancers.  
503 The red arrowheads delimit the serial deletion breakpoints. The three consecutive deletions are depicted  
504 by red dashed lines. Below are RT-qPCR quantifications of expression levels relative to wild-type (n=4)  
505 in three mutant lines carrying serial deletions of 5DOM (n=3). The horizontal red line represents the  
506 value of 1 for reference. Severe reductions are observed for both the *Del(Rel5-SB1)* and *Del(Rel1-Rel5)*  
507 conditions, unlike in the *Del(SB1-Atf2)* deletion. Scale bar; 100 kb.

508  
509 **Figure S9. Sequence conservation in vertebrates of the GT2, isIE and CsB UGS enhancers.** All  
510 three sequences are comprised in the box highlighted in Fig. 4a. The ATAC-seq and H3K27ac ChIP-  
511 seq profiles are shown with, below, their sequence conservation from fishes and mammals. The thick  
512 blue lines below the H3k27ac profiles indicate the extent of the transgenes assayed in Fig. 4. Scale bars;  
513 1 kb.

514  
515 **Figure S10. *hox13* gene expression in the Daniocell atlas.** **a.** UMAP of endoderm cells using matrices  
516 extracted from ref.<sup>56</sup>, colored by tissue. The black rectangle indicates the UMAP region which contains  
517 cellular clusters from the cloacal region. All other panels in the figure correspond to this rectangle. **b.**  
518 UMAP of endodermal cells and identities of their clusters. The colors indicate the identities of cells  
519 from both the cloacal region (red arrow) and the posterior intestine (dark green, arrow). **c.** UMAP of  
520 selected endoderm, clustered by developmental stages (color code below). **d.** UMAP as in panel b, with  
521 the expression in red of the various *hox13* paralogous genes. All cells with a normalized expression

522 level above 2 are displayed in red. In panels **c** and **d**, arrowheads indicate *hox13* expressing cells in the  
523 cloacal region either at early (red) or late (black) timepoints. The black arrows point to *hox13* expression  
524 in intestinal cells.

525

526 **Figure S11. Cloacal region phenotypes in *hox13* mutant zebrafish. a-f.** Confocal micrographs of  
527 mutant cloacal regions at 6 dpf shown in single channel (**a-c**) and pseudo color (**d-f**). **d.** Triple  
528 *hoxa13a;hoxa13b;hoxd13a* heterozygotes (n=6) exhibit wild-type patterning with separate openings for  
529 the hindgut (blue) and pronephric duct (yellow). **e.** Homozygous *hoxa13a* single mutants show wild-  
530 type patterning (n=4). **f.** Homozygous *hoxa13b* single mutants have wild-type patterning (n=4). **g-h.**  
531 Length and width of the hindgut and pronephric duct in wild-type and *hoxa13* mutant zebrafish embryos  
532 at 3 dpf. **g.** The length (red dotted lines) and width (white dotted lines) of the hindgut and pronephric  
533 complex at the median fin fold level were quantified in wild-type (n=4, left) and *hoxa13a;hoxa13b*  
534 double mutant embryos (n=5, right). **h.** The length difference of the hindgut and pronephric complex  
535 between wild-type and *hoxa13* double mutant embryos is statistically significant (\**p* = 0.0101, two-  
536 sided Welch's t-test). The error bars indicate the standard error of the mean. Scale bar length is 30  $\mu$ m  
537 in **a-f** and 100  $\mu$ m in **g**.

538

539 **Table S1. Extent of the mouse and zebrafish domains.** Sizes are indicated in base pairs and were  
540 determined based on the transcription start sites of genes.

541 **Table S2. Accession numbers for re-analyzed data.** SRA accession numbers and reference of  
542 publications for the re-analyzed data when previously published data was used.

543 **Table S3. RT-qPCR primers.** Lists of primers used in RT-qPCR experiments.

544 **File S1.** Sequences of the zebrafish probes used for WISH

545 **File S2.** Sequences of the mouse probes used for WISH

546 **File S3.** Sequences of the zebrafish *hoxda*<sup>Del(3DOM)</sup> and *hoxda*<sup>Del(5DOM)</sup> founder alleles

547



Hintermann\*, Bolt\* et al.  
Figure S1

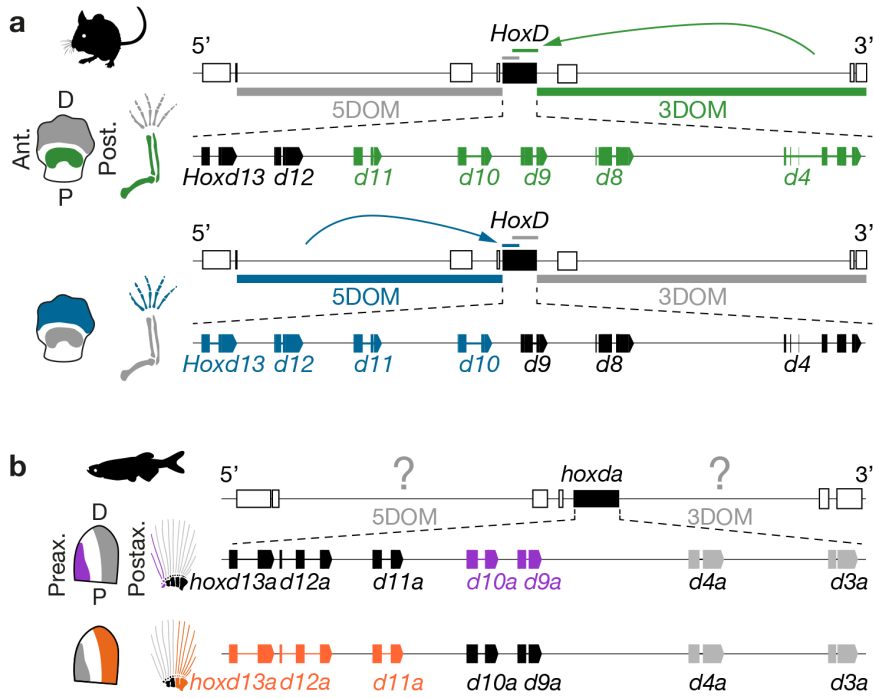

Hintermann\*, Bolt\* et al.  
Figure S2

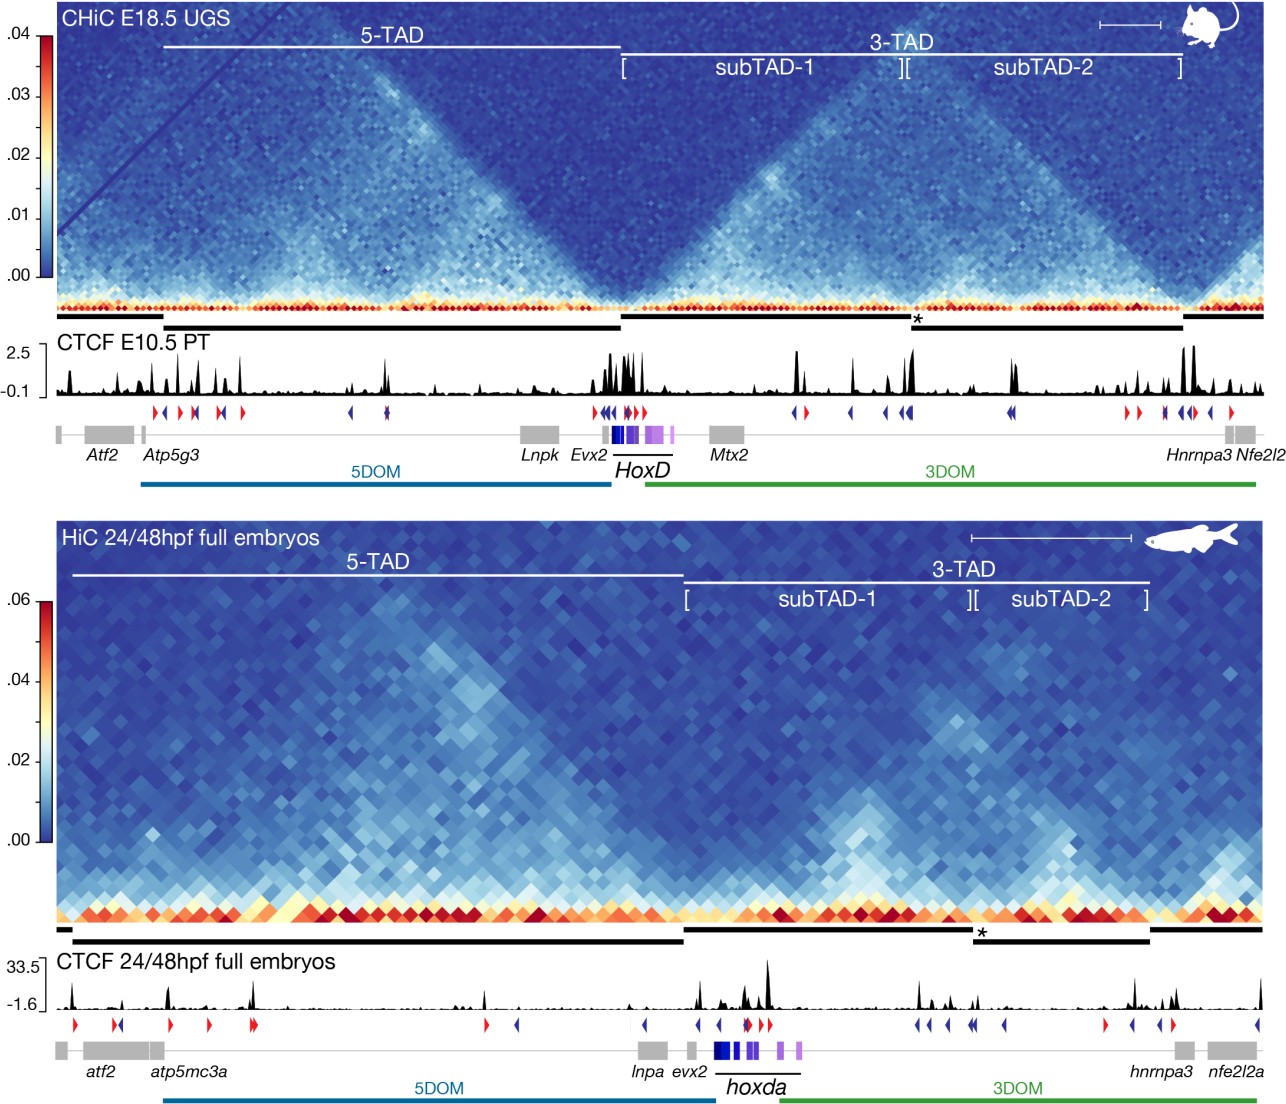

Hintermann\*, Bolt\* et al.  
 Figure S3

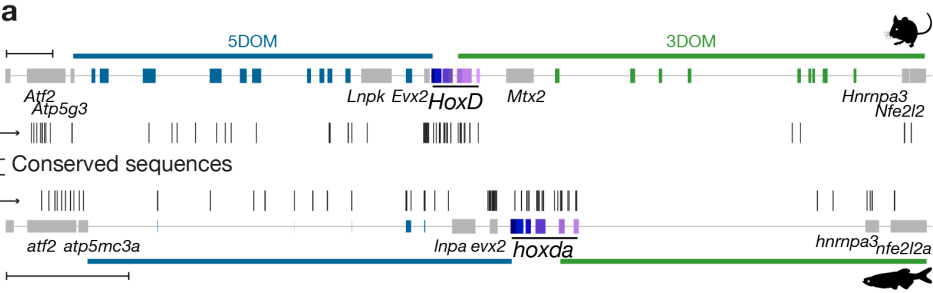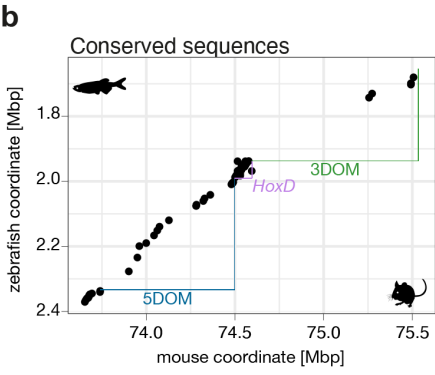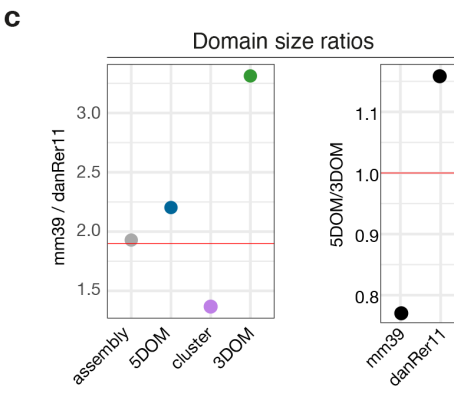

Hintermann\*, Bolt\* et al.  
Figure S4

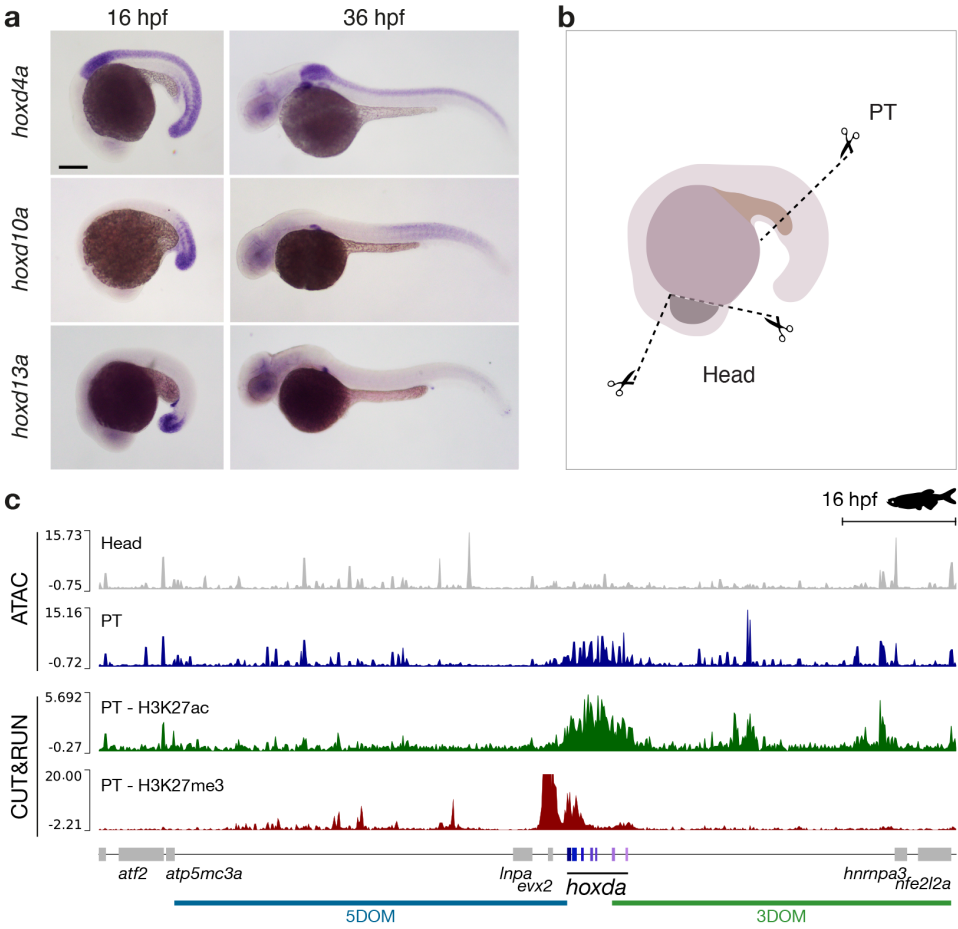



Hintermann\*, Bolt\* et al.  
Figure S6

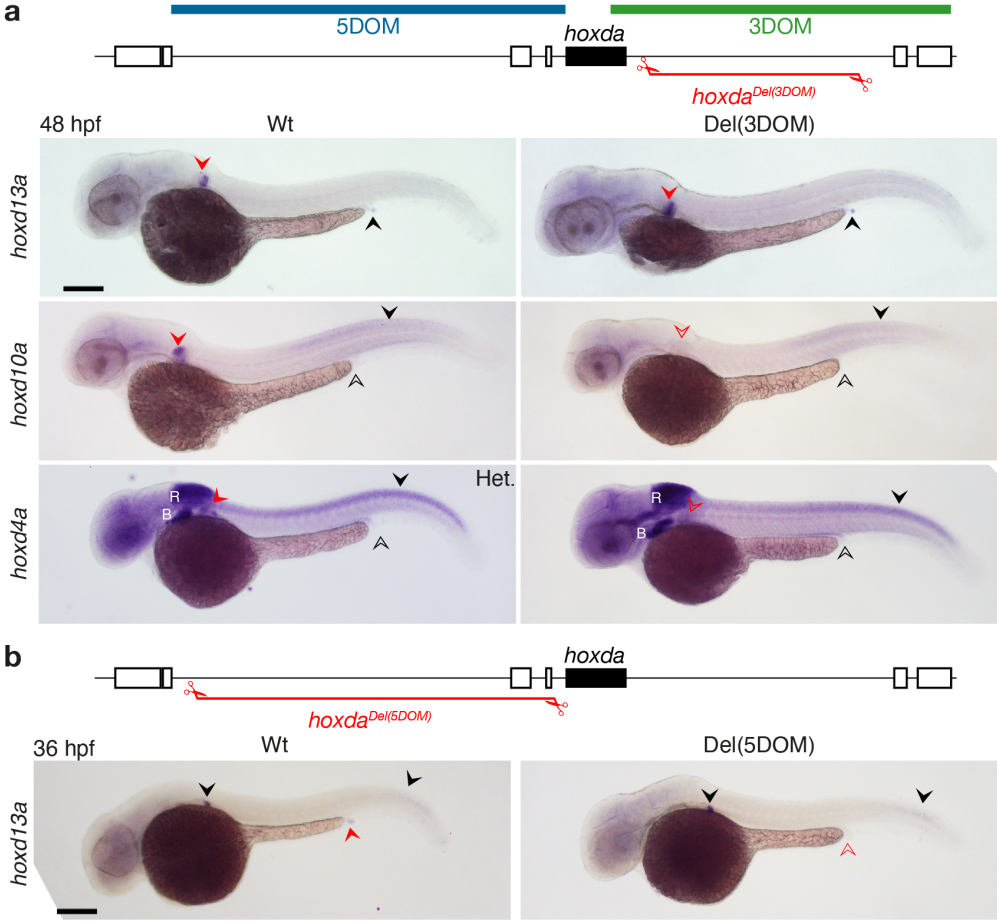



Hintermann\*, Bolt\* et al.  
Figure S7

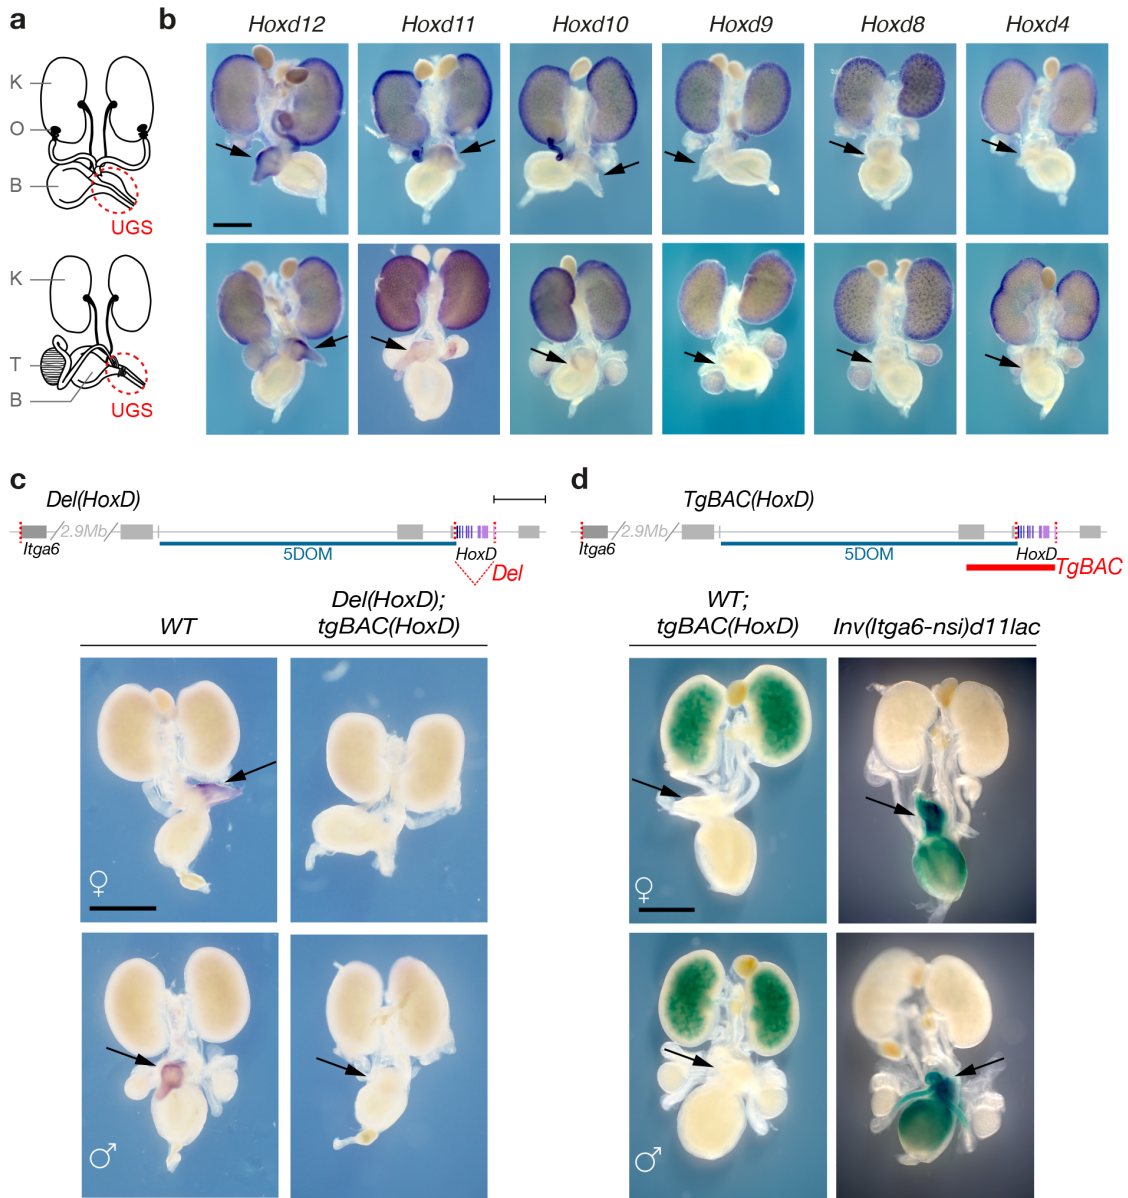

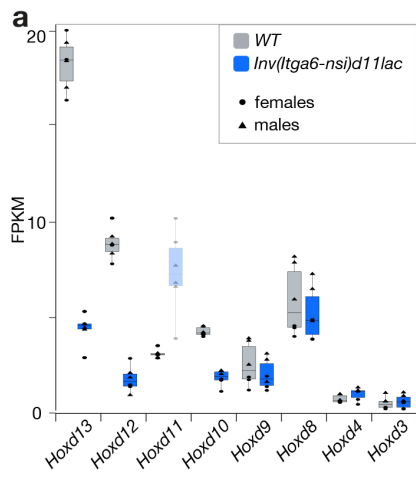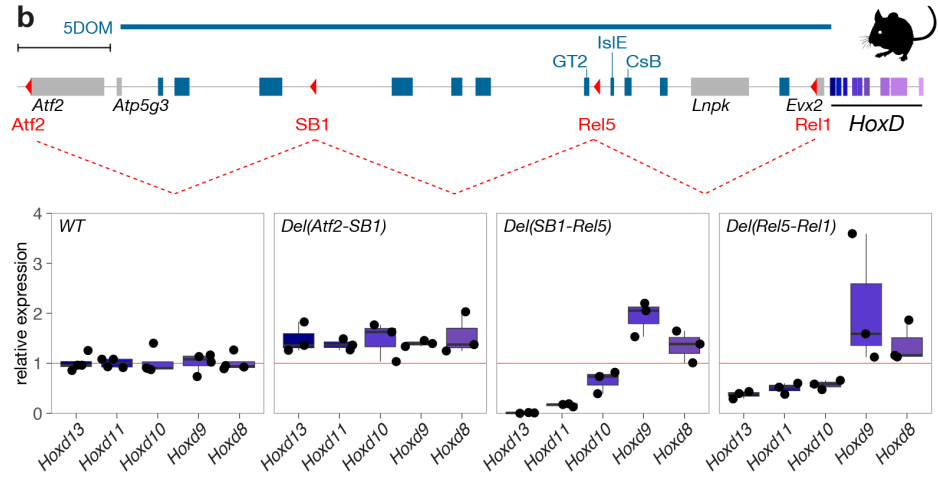

Hintermann\*, Bolt\* et al.  
Figure S9

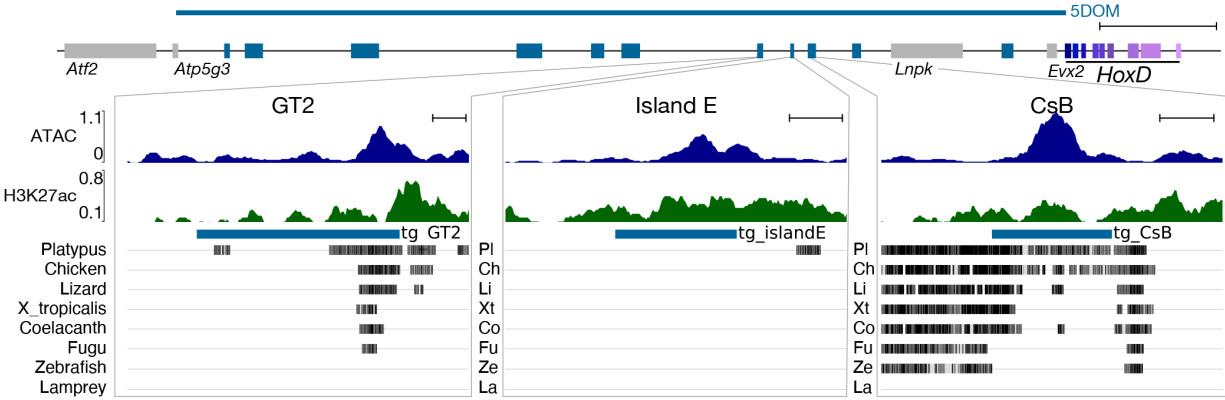

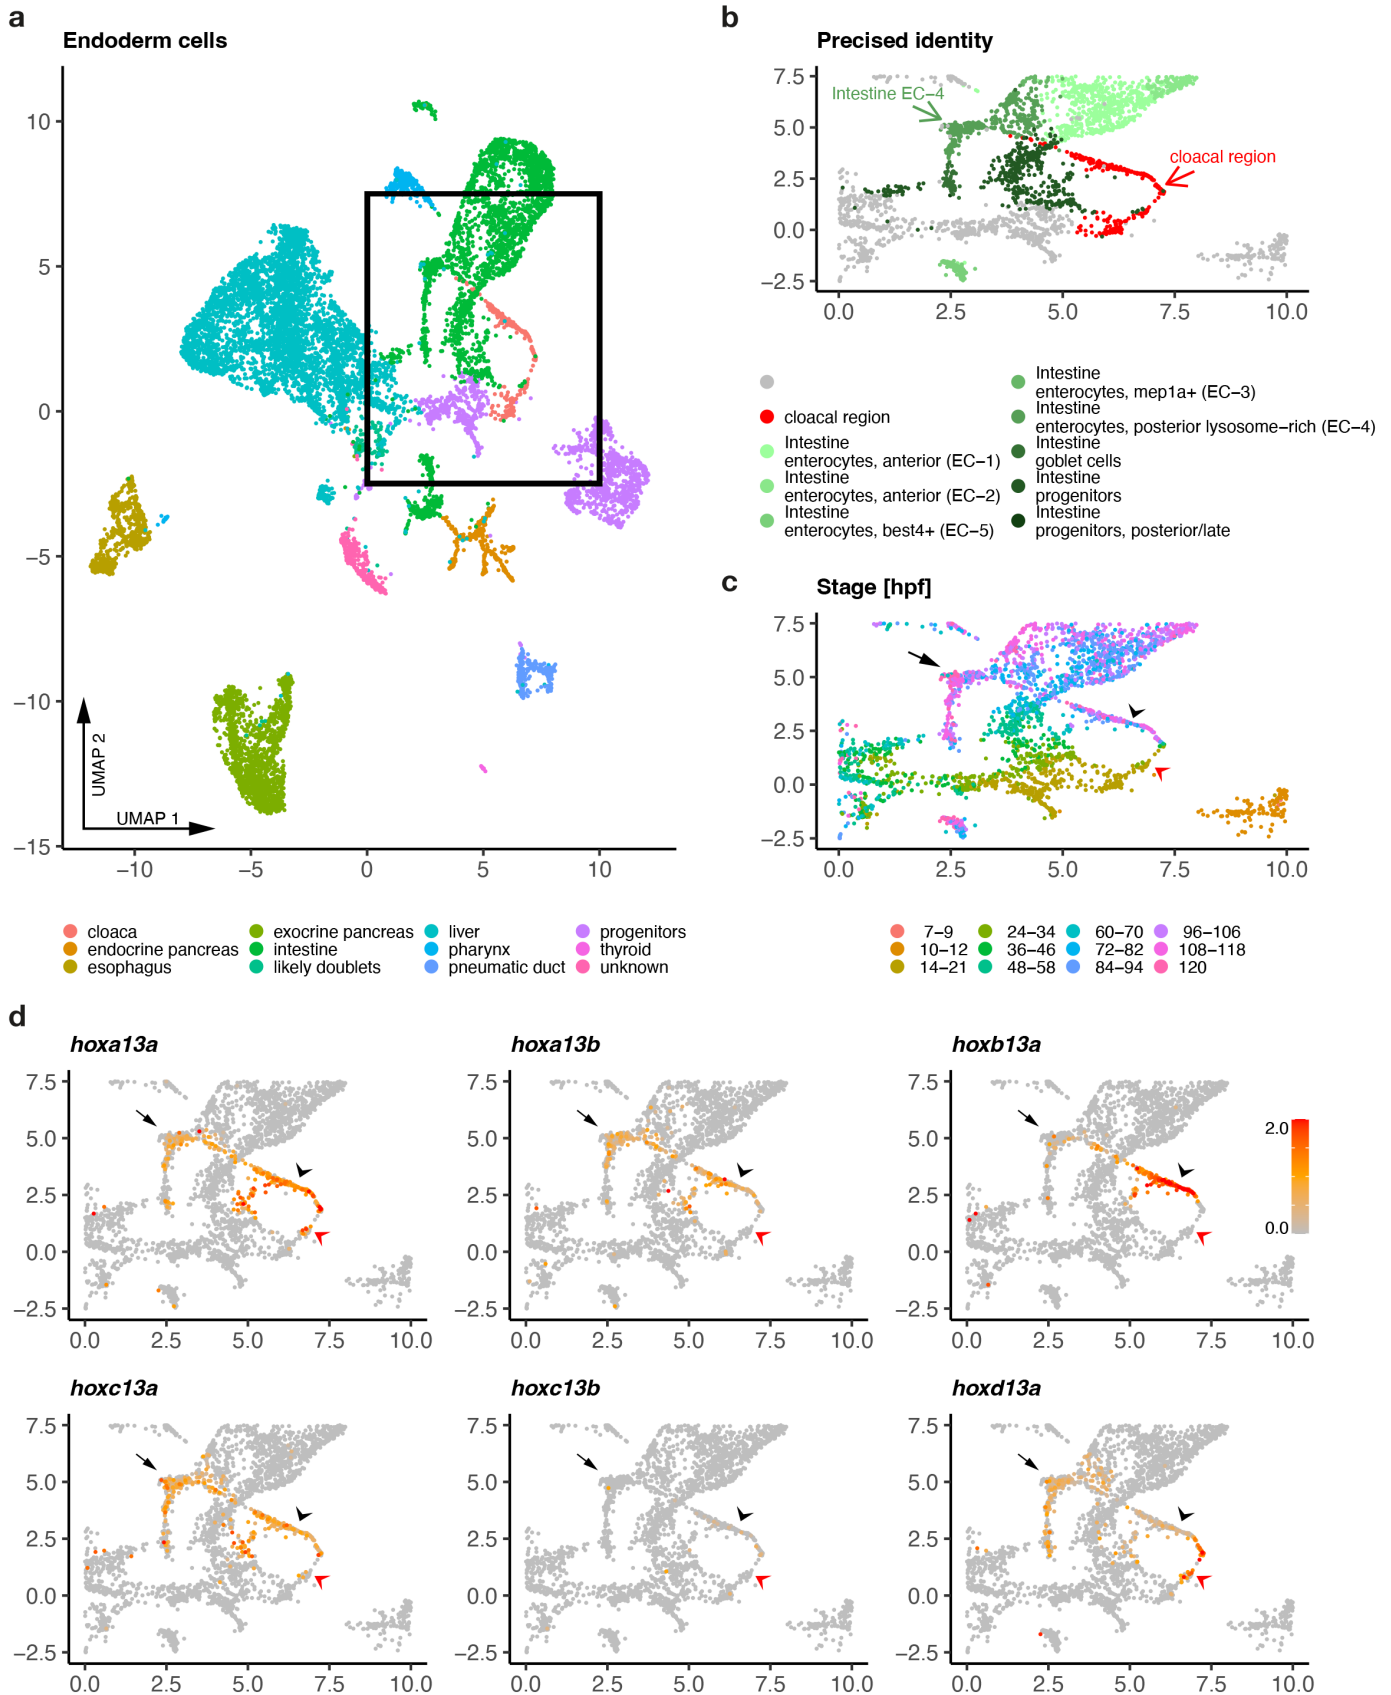

Hintermann\*, Bolt\* et al.  
Figure S11

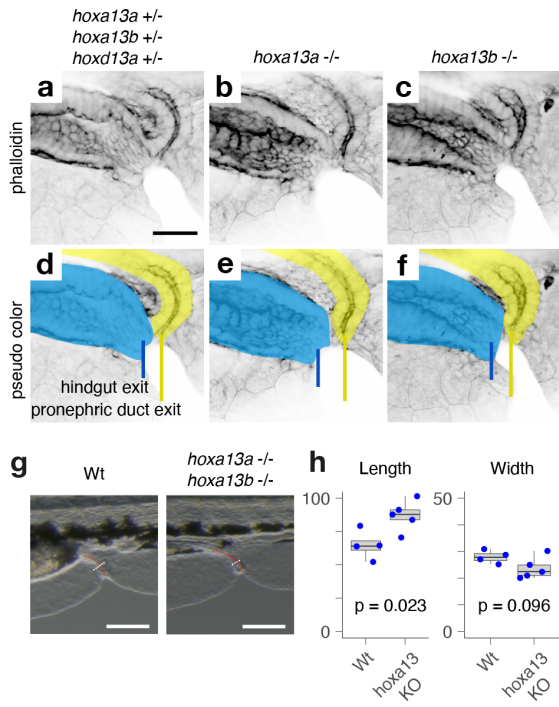

Hintermann\*, Bolt\* et al.

### Sequences for zebrafish ISH probes

>hoxD4a\_probe\_danRer

GAGTGTGTGCGCGATCTCGATGCGACGCCGTCTTGTTAGATACCTGTAAAATGAAACTCCTTCTCTAGTTGAGAACCTGCTGTC  
TTGTGTAGGCTGTCCGAGAACGTTTGGGTTCCAGGTCCTGTGTAATCCGGGTTACCCGTAGTAACGTGCACTTCTTCATCCACGG  
GTAAACTACAGCAGGCTGCTTCGTTGGTATCCCGTTCTGGGTCTTTGTGTTTTGTTGTTGTCCACCAGTCTCGATCCGGAAATCT  
GGACCGCGGGACACTGCTCTGTCTGTGCAGGGAAAGGGCTAGGGGTGCTGGCTTGATCCTGCACATGACCCCGCGGCTGCACC  
GACGAGCCCTGGACAGTGTACAAGTGTAAAGGCTGTTCCAGAGTAGTTTGACCGTGAATAGATTCCGGGATGCTGGAAATCAGTG  
TCCTGCGACGGACTGTAGTAGCCTGGGCTCTGTTCCAGGTATATAGCTGTTCTGAGAATATTCCTCGCAAGGAGGAAATTTGGGATC  
CACATACTTGGAGTTCACCATGTACGAACTCATGGCCATTAATTTCTGAAGGTAGGAAATACTAATTTTTCTCGAGTTGCTTTTTTT  
CCTCCCTCCATAAAGCCCTCC

>hoxD10a\_probe\_danRer

CAGAACATGATTCCGGGAATCAGGCTGGAGTACGCGGGTATCTCAGACGAACTGACCTTTGCTCTCTTGTGCGGAGTACATAACA  
GTTAGTCTCTTCTTTTATGCTTTGTGAAAATGTGCAGGTGGACATCTGGTTGAGCGTTGCTCTAATCGGCAGGACCTGCTCGGAT  
CTGCCAGGTATCAGTTTGGAGTATGTACGAGTGGACGGTCATGTCCATGTTTTGGTGGTTTACTTCCCCCGTTTGCCAAGAGCC  
GGCAGGAGTCCACAGGTTTGCATTCCATAGTTCCCATTTCTGCAGTGGCTGCTGGCATGTACATGTTACTGCTGGAATAAAAATC  
TGTTCTGCACGCCCAATCAAGGAATCTACCAAAAAAGTGTGTTGCTGCAGGAGAGCTGTTGGGAAAGGACATTTTGGATTTTTT  
TTGTTTTCTTTTTTTGTTTTAAGAAGCAGAGAAGTGTCTCTGTAAGCTGACATATCTAGCAAAAATCCCTGTATAACCCAGCGA  
GTCTCTGCAACCACATGACACTCTACCAATGAAATTTGAAAATGGCCTTGAGACGCAGG

>hoxD13a\_probe\_danRer

TGCAGACGTCAGGTCCTTCTTATCCTTGACCCGTCGGTTTTGAAACCATATAGTTACTTGTCTCTCAGACAGGTTGGTAGAAGAA  
GCGATCCGCCGTCTGTTCTCCTTTGTAATGAACTTAGTGGTGTGATTACGCTCGAGCTCTTTCAGCTGAAATTTTGTGTAAGGA  
ACCCGCTTCTTCTCCCGCTGACAGAATGAAGCCGCTGCTGCTTCTCTGTTAATGATGGTTCCAGATATGCGGGCTCCGCGT  
CTGGTCTGAAAGCAATAAAGTTGACTGCTGCAATTGTTGACCACTCCCAATGTTGGTGGCCTTCCATTGTCAAACAAGTCTCAT  
GTCTAAGATCTCCCATATTGCTCTCTGAACCACAGGTAGATCAATGAAGGCAGGGATTCTCGGATAGGAGCGCGCAGCCTTG  
ATAAAAGGCGAACTCTTTAAGCCAGCTGGAGGCTTACCCGTGGTCCACGGGTTTATTGGCGAACTGTCCGTTTTGCTTCGCAACA  
CCAGGCGGGAACACGGCGTTCTGTGGAAGTTTGTAACTGTTTTCCAATGGCATCCAAACGTGAAGGAGCCAGAGCCGATATTG  
GATGAAAAGAAAAGTAAGGACTGATAGACTCATTGCATACAGAAGTCGGTTCGATCAACAGCGGAGAGCACCGGCGCTCCTGAT  
GTACACCGGCTTGAGTGAGTCC



Hintermann\*, Bolt\* et al.

## Sequences for mouse ISH probes

>Hoxd4\_probe\_mouse

```
TAAGACTATTCACCATCTTAAGGTTTTTGGCACGCAGGTGTGCGTTATTTTCTGCAGTCCATTCCCCGA  
ACAAATAAATATTTAAGCAAATATAAACTAAACATAAAATAACCCGTTTCCTTCTTGGATTTATTTCTT  
TGGGCATGGGCCACTGGAAGCAAACAATTTCTTTCTTTCTTTTTTTTTTTTTTTTTTAAATCACAGAAGAAA  
TTCTATAGATAATCCAGAAAGTTCTGGGATTCTGGCTCAGCCTCTCCTGCTTGCCTGAAAGCACCTAG  
CACTGGCTGGCCTTCTGCCTCAACTCCCCACAGTTACTAAGCCACACAGCTCCCTGAAGGGGGTGGT  
GTGGAGGAGACCATCCCGGTTCCCACTGGGGTAAAGCCTCCAACCTTCATTTGCAAATTCATCCACC  
AGCAGAGATTTTCAGGATTTAATGACTCGCCAAGGGTTATGTTCTCAGTAGCTCCTGCCATATGATA  
ATCTACTTAAAGAAGCCCGCCACCCTCCCACCTTCCCCACTTTAGGGAGGGGGCTGCCCTCGGGCA  
GGAAGGTAACCTAGTCCGAGGGCGGCCTGCAGGTCCCAGGTCCACCCACAGTACCTTAGAGCCAG  
TGAGGTGACAGCAGGCCCGCCTGCACCCGCAGCTTCGCCTCAACCTGGAGTGCAAGAAGGGATAGG  
CCCAGGGTCCCCACTTCTATAAGGTCGTCAGGTCCGTATGGTGGTCTTGGCCATTGGCTGCAAATGCT  
GGCCCGGGGACAGCTGAAGAGGAGCAGGAAGATGAGGAAGAAGACCTGCCCTTGGTGTGGGCAGTTT  
GTGGTCTTTTTTCCACTTCATCCTCCGTTCTGGAACCAGATCCCCGGGCGAGCTCGAATTC
```

>Hoxd8\_probe\_mouse

```
TGCAGGCATAATTTTTAAAAACATTATTAATAAACTTCTTTAATTTACTCACCATAAAGATTTAAAAT  
GTTCAAGTGCCTTGTGGATTAATAAAGCATTATATATTCAATCATCTAGCGCTGATCATTAGGAAGT  
TTATGTTGTTGAGGCAAACCACCAGCTCAGACGTTAAAAATTACCATTATAAAAAATATAGCCACAAGG  
TCCGTATCAAATTACCCTTCTATAGGACAGCTCAAGGACTGCTTCTATGCGATACTACAAACTATTCTC  
TTTTAAAAACACAGAAATCCCTTTCAAAGCGCAGAAACCTCAAGAGCAGTGACATTAAGGTAGCTTGAA  
ACACAGGTAAGTCCGTTTCCAAAACACAAGAGGGAGGACCGGTGGTGTCCACCAGTATATACTTATA  
CTGATCATCAGTCTTAATAGTCTGTGGTAGAAGTGTAAGGTAGAGTTAATTTGTGGGGCAGCCTTCA  
GCTCCGTCTTCTTCCAGCCCCGAGACTTCCTTTTTGGGGTCTCCATCCTTTGCCTCCGGCCGGGACGCA  
GGAAACTTGTCTTTGTTGTTCTCTTTTTCCATTTCAATTCCTGTTCTGGAACCAGATTTTTACCTGTCT  
CTCCGTGAGGGCCAGAGTATGGGAGACCTCGATTCTCCTCTTCTGTCAGATAAGGGTTAAAAAGGA  
ATTC
```

>Hoxd9\_probe\_mouse

```
CTGAGTTGGATTTTAGTTGGGAGAGCAGGGTGGGGGTGTCACACTCTGTCTTCCCTCAGATTCTCGGA  
ATTAGATCGTTGGCCCTGTTTGGGAGGCTGGATAGGGTGAGACTAACTACAGCACTTTTCAGAAACA  
TGAGGGACATTTACATAGAATAGGGCTCCATCAAGCCTGCGTGCCTCACAATAATATAGCATTTCCTA  
AGGAATCAGGGGAGCAGGGAAGGGAGGGAGTGGGACAGGACAAGACTCCAAGCCACTTGGTTTCTC  
CAATACATATGCGAGCAAATACAGTGTCCCCAGATAACTCACAGAGACCAACCACACAGTCACTTCT  
ACCTAAAAAAGAAGAAAGTCCGAGTCGCTGCAGAGTTTCTGAATCAAGCACCCACAAAGAAAACAA  
ACAACAACAAAAAACAACAAAAACAACAAACAACAAAAAACCCTGCTGCTTTTGGAG  
TGCTGCAGGCCAGACCCGCACTGGGTGAGTCTCCTTTAGGGCACTTCTCCTTGCTCATTTTTTCATTT  
CATCCTACGGTTCTGGAACCAGATTTTACTTGTCTCTCTGTAAGGTTGAGAATCCTGGCCACCTCGTA  
GCGCCGGTCCCGGTGAGGTACATGTTGAAGAGGAATTCCTTCTCCAGCTCTAGCGTCTGGTATTTGGT  
GTAGGGACAGCGCTTTTTCCGGGTGGAGCGAGCGTGGATC
```

>Hoxd10\_probe\_mouse

```
GGTTTTCTTAATCTTTTGAATATATATAGATATAGGTTGTTTGTTTTTTTAAATACTGGATGTTTTCAA  
AATGCCATGAGTTCATGGGCTAACCCACACACAGAGAACTTTTATGTTAGGAAAAACATGGAAAAGTCA  
CATTGCTGGCGGATAGATGGGTGGGATGCGATGGATACGTTTATAGATAGATGTTCTACAGTTCCAATA  
AGTTAAGACCCAAATGAAAATGCGCAGTAATAGTTACCCTGCATTACGATGAAAAAAAATAAATTAC  
ACGTGCTAAGTTTTTTTTAATATATATATATATGTATACTCATAGGGATTACAGATCACTTGCAGCACGA  
ACAGAATGACCCAAAGTACATTTCTAGCAGGAAAAACAGAACAGAACAGAACAAAAACAAAAACAAA  
AAACCAAAGAGCAATGAAGGGTTTGTTCGCTTGGCAGTCTCCAGCACTCAGGCCTGGAACCTCGG  
TGCCCCCTCTCGGATCCTGGCTCACATGGGCCTCAGACCTAAGAAAAGGTGAGGTTGGCGGTGAGTT  
CTCGGATTCGATTCCTCCTGGCTCATCTTCTTGGATTTTCAATTCGGCGGTTTTGAAACCAATCTTGACCTG
```

CCTGTCGGTGAGGTTAACGCTCTTACTGATCTCTAGGCGGCGCTCGCGGGTGAGGTACATATTGAACA  
AGA ACTCTTTTTCCAATTCCAGCGTTTGGTGCTTGGTGTAAGGGCACCTCTTCTTTCTGCCACTCTTTGC  
AGTGAGCCAATTGCTGGTTGGAGTATCAGACTTGATTTCTCTTTGCTTTCCTTCTCCTGCACTTCGGGA  
CTGGACACGGAAACCTCAGCCAGGCAGCTCCTGTCTTCTGGAAGGCCGCCTTTGGCCTCGGGGCTCTC  
CACTTGGGAGACTTTAGTGGGCTCCTGGCCGCTCGCGCTTTCGTTTCATCTTCTTTTCCATCTGCAGCTGG  
GCAGCCGAGAGCTGCGGCTTGGCCGCGCCACGAGGGTTGAGCTGGAGCATGACAGTGGAGCTGCCTT  
CGGGGCTGTTATTGCACTCTTGGGTTTTCCCGGTGGCGTAGGTCTGACTCAGTCTAAA

>Hoxd11\_probe\_mouse

TTTTGTAGAAAACATTTATTCACACACAAAAAGACAGTGACTCATGCCCAAAGGTACATTTCCAGAG  
GTTTAAATAATCTGTGTTCACTGAAGGGAAAGAAAGGGATTTCTTAAACTCAAAAACAAAACACTGGCT  
CCTTCTAGCCCCATGGCCTAACTTCCTACAGATCTCGCCGCGTTGAGGACTCAGAGAGGGAGGAGAGG  
AACAAACAGCGCATTGGCGGTAAAATTGGAAAGGGATGTTTACATTTACCATGTTCCCCTTATTAGGAT  
CCGCACAGCCAAGTTCCGGGCCTCTTCTCAGGCTGTAGTGGTCGCTGGGAGGTCCCAGTTGAAGGC  
GAGAAGAAATCGTGAAGTTCCACAGAGAAGAGGCGTCATTGAACCCAAGGACATTGGGCCTGTGAG  
AGCAGGCTGGTGGGAGGAGGGTGGGTGAGTGGGGCTCTGGGGAGGGGGTACATCCTGGAGTTTCTCA  
AAATAAGGGGTTTTCCAGTGAATATTGCAGACGGTCCCTGTTTCAGTTTCTTTTCTTTCATCCTGCGATT  
CTGGAACCAGATTTTGACTTGCCGGTCAGTGAGGTTGAGCATCCGAGAGAGTTGGAGTCTTTTCTCTTT  
GTTTATGTATACATTAAGAAAACTCGCGTTCCAGTTCGCGGATCTGGTACTTGGTGTAGGGACAGC  
GCTTTTTCCGGGACCTCTGGGGGGCCACTGTGCCCGCGCTCTTTTCGGCCCCCGCCTCCCCGGGGGGC  
CCTCGCCTTACC GCCACCGCCTTCC

>Hoxd12\_probe\_mouse

TGGACAGATTCTATAACAGGCGTAGAGCAACTTCATTACAATTCAGAAAACCTAGGTTTCTCAAGGT  
AAACCTGGCAGGGCTTGGGGCCTTAAAAGCTTTACAAGAGCTGACCACCAGTCTCTGAGAAGAGACA  
CCCTAGCTAAGTTCTGATGGAGTTGGTGGGTGGTGGAGAGGATGGGGAAGAAGTGCTGGTTTTCTGTC  
CTTCAAGAGCAGCAACTACAGTCTGAGAATCTGAGAGGTTTCTTCTCCACCCTTCAGACTCCTCAAGG  
AGGCATTTTTTTTTGGGGGGGGGGTCTCTTCTGTGGTGATACATTAAGGAAATTCAAGAAAGACAGAC  
ATATGGATAACTTCATTCAATCAAGAGGAGAGTCGTGGTTACAGAGTGCAGATCCTCCTCCGCTCGCT  
TACTCTTCTTCTTCCCTGTGCAGCCAAGCCTCAAACAGGCCAGCAGCTCCCCACCCATAGCTCAG  
TTCTGGGGATCTAGTTACAGAGTGCTTGGCCTTGGCTCAGGGATAGGTGAGGCTGGAGCAGGGGAATT  
ATGACAGTCTAGAGACCATACTTTGTTTTGGAGTCCAGTTTCTCTCCCTGTCTCTGAGAAGGAGATCT  
TCCAGCCTGTTTTACTCAGCAGGAGAACCCTTGAAGCGCTGAGGTTCCAGGGTATCCTTTCCTCCCCC  
CCCCCACAAGTCTGAAGGTCTAGGGTAGCTTTTGTCTCCCAAATCATTAGGGCAGATGGGGGTTG  
TGGAATCAGGCCCTTCTCTTCTGCAGAGTGGAGAGCCCAGCTTTGTCAAAAGGGCTTCTGCTGCGA  
AGGGGCTAGAGTTATCCCCAGCCCCCTGCACTGCAGCGGGGTCTCAGGGCCTTTTACCTGCACTTATA  
CCCGGAGCTCTAGCTAGGCTCCTGTTTCATGCAGAAAGAGCTGGATAGAGAAAAGAAAAAGAAAAAGA  
ACACGTTGAAAACCGGAAAAAACAAACCCTCATA CAGTGTTC AATAGTGAGCCCCGGATGTAAACAT  
CATAGACAAGGACAGGTGACCCCCAGACACCATGCTGAATGTTTAAAGCCAGTGTTAGATTGCAATTC  
CCAAACACCTCTCAGGAGGGTCCCAAAGAGAGCTGAAAGCGAAGGGGGCTCCACTGGCCTCATC

>Hoxd13\_probe\_mouse

TCTAGAGGCAGCACAAAGCTTGAAAAACACAAATGGATGAAGACTCAGTGGAGACAAGAGAGTTCTTT  
TTATTTATATCTCCCTAGGAGTAAAATGTGATTTTTAAATGCTCGAAGCACTGCTCACACACTGTAT  
CTACAAAAATAATCTTTCAGTCCCATAAATACGCAACATTTTTGAAAGTAGTTTCATCACTTTCAGAAGT  
TTCTTTTTCCCTCTTGGTCCCTAGAGCTCCATATTTAAAAAATGTGTTAGATATTTTAAAGCTCTGAGAG  
GCCCATGCATTCAGACAATTA ACTTCTTCACTGAGCTCTGGACAGAAGTTCCCACCCATGGCCACATTG  
GCTGAGTCTCTTCCAAGGATTGAGGAGATGGCCTTAGCTCCATTCCCACAGACCCAAGGAACGGGAT  
GAATTTATACTATCTCCAGTCACTCTGCCAAGTGAAGTATTTAATAGCTGCATGTAGAGTTGGAGAA  
ATAAAGGCATCCACTAGGAATGCTGTTTTCAGGTTCAAAAATCACAGCTACAAGACATGTTAAAACCA  
CACAAAACAGCAAAGGAGACTGCCAAAGATAAGGGTGATTGTCTTAATTTCAATATTAATAAGGTAGC  
TGCTTTTAAAGTCATCACGTGCCTTCAACCTCAAAGTTTCAGACTCTCCAGCGGTCTAAATCACCTA  
ATGCCTAAGAGCTGTTTCCACTTGCCTTGGGGAAACTTCTGAGAGCTAATGATTCAATTACACAATCAC  
AGGGTATGAAAGGCTAAAAAAAACGATTCTGGCCTAATGGATTATAAGCATAATCAGTGCTGGAAAC  
ACATATAAAATCCTGTTAAAAAAAATAAACCCCTAAATACAAGGGCACTTCTGAAATTCATTTGGGGGG  
ATTATTGAAAAAATACTTCAAGTTTTTTTTTCTCATACTGGCCTGGAGG

## Hintermann\*, Bolt\* et al. 2024

### Sanger sequences of the zebrafish founders for *hoxda*<sup>Del(3DOM)</sup> and *hoxda*<sup>Del(5DOM)</sup>

>del3DOM\_founder1

```
NNNNNNNNNNNNNGNNNANTNNNCTCNTGACGACTACAAAGTTATTTAATCTACAAACCAAGTTGATTTTATATACTCCATTG
GGGTTTTGTAGCGTATTATTGACGTCTTGAATCCTTTTAGAGCGTGTGTGGTAATGTGTAGCCTCTTTACAGACTAATAAATGCT
ACAGGCCTCTCACATGATATGATTAATAACTGTAAAAGAAAACGTTGCGCCACCAGAAGTGTCTAAAAATGATAATCTAGTCTC
CCTATTGGAGGCCATAATGTAATGTGATGATGTATGGAGACCTGCTAACATTAACACAAGCCACACTACTCCTTTACGTGCTA
CACTAAAAAGAGAGAAATTGGTGAAGGGCATTGCTCTTCAACTAAACATCACAAATGTGCCGTTTCAGCAGTGTTACAGCAA
NTNC
```

>del3DOM\_founder2

```
NNNNNNNNNNNNNNNNNNNTNNNCTCATGACGACTACNAAGTTATTTAATCTACAAACCAAGTTGATTTTATATACTCCATTGG
GGTTTTGTAGCGTATTATTGACGTCTTGAATCCTTTTAGAGCGAGTGTGGTAATGTGTAGCCTCTTTACAGACTAATAAATGCTA
CAGGCCTCTCACATGATATGATTAATAACTGTAAAAGAAAACGTTGCGCCACCAGAAGTGTCTAAAAATGATAATCTAGTCATT
ATGGCCATGGAGGCCATAATGTAATGTGATGATGTATGGAGACCTGCTAACATTAACACAAGCCACACTACTCCTTTACGTGCTA
TACACTAAAAAGAGAGAAATTGGTGAAGGGCATTGCTCTTCAACTAAACATCACAAATGTGCCGTTTCAGCAGTGTTACAGC
AAANTNCCGGGAGA
```

>del5DOM\_founder1

```
GGNNNNNNNNNNNNNNNNNNNGGANTTCNTGCATGCCNGAACATTTATGCTTCCTTTTCCCAAATGCCTGTAAAGCACAGA
CATTTTTCTCCTTAATTACTTCCCGAATTTACCCTACTTCTGTCCCAATTTTTTAAACTTACTTCAAATATTTGAAGTGTGATTTT
TGTGGCTGTCTGAAGCGTTCAATCCATCTATAGCACAATCGCGTGTGCGTTTTATTTGAGTTTTGGGGATTTTCTGAGAGGAT
CCCATTGCGAGGTCATGTGTCTTCCATTATCTGGGTGTTTTCTAATCAGCCTGCAGTGGCTGANATTAACAGGGAAGAATTCT
CCCATCAAACCGGACTGTGTAATCCAGCTCACCTTGGAGAGCAGAAGGGAAGTGCAGATCTGTAAACCCATCATCGCTCCG
CTCCCCACACACTTATGCTCCACAANAGGACNNNNN
```

>del5DOM\_founder2

```
NNNNNNNNNNNNNNNNNNNANNNNNNGCATGCCAGAACATTTATGCTTCCTTTTCCCAAATGCCTGTAAAGCACAGACAT
TTTTCTCCTTAATTACTTCCCGAATTTACCCTACTTCTGTCCCAATTTTTTAAACTTACTTCAAATATTTGAAGTGTGATTTTGT
GGCTGTCTGAAGCGTTCAGTCCATCTATAGCACAATCGCGTGTGCGTTTTATTTGAGTTTTGGGGATTTTCTGAGAGGATCCC
ATTGCGAAGGTCATGTGTCTTCCATTATCTGGGTGTTTTCTAATCAGCCTGCAGTGGCTGANATTAACAGGGAAGAATTCTCC
CATCAAACCGGCTGTGTAATCCAGCTCACCTTGGAGAGCAGAAGGGAAGTGCAGATCTGTAAACCCATCATCGCTCCAAC
TCCCCACACACTTATGCTCCACAANAGGACNNNNN
```

Hintermann\*, Bolt\* et al.

**Table S1: Sizes of mouse and zebrafish domains**

| mm39_short_name | mm39_RefSeq_ID | mm39_transcript_start_chr2 | danRer11_short_name | danRer11_RefSeq_ID | danRer11_transcript_start_chr9 |
|-----------------|----------------|----------------------------|---------------------|--------------------|--------------------------------|
| <i>Hoxd4</i>    | NM_010469.2    | 74552322                   | <i>hoxd4a</i>       | NM_001126445.2     | 1951004                        |
| <i>Hoxd13</i>   | NM_008275.4    | 74498569                   | <i>hoxd13a</i>      | NM_131169.3        | 1990311                        |
| <i>Nfe2l2</i>   | NM_010902.5    | 75534860                   | <i>nfe2l2a</i>      | NM_182889.1        | 1654399                        |
| <i>Atp5g3</i>   | NM_001301721.1 | 73741670                   | <i>atp5mc3a</i>     | NM_201176.1        | 2333895                        |

| Domain               | Domain_name | mm39   | danRer11 | mm39/danRer11 |
|----------------------|-------------|--------|----------|---------------|
| <i>Atp5g3-Hoxd13</i> | 5DOM        | 756899 | 343584   | 2.2           |
| <i>Hoxd4-Nfe2l2</i>  | 3DOM        | 982538 | 296605   | 3.3           |
| <i>Hoxd13-Hoxd4</i>  | cluster     | 53753  | 39307    | 1.4           |
| <i>whole genome</i>  | assembly_Gb | 2.7    | 1.4      | 1.9           |

| Ratios       | mm39 | danRer11 |
|--------------|------|----------|
| 5DOM/cluster | 14.1 | 8.7      |
| 3DOM/cluster | 18.3 | 7.5      |
| 5DOM/3DOM    | 0.8  | 1.2      |

| Name         | Assembly      | Ratio |
|--------------|---------------|-------|
| 5DOM/cluster | mm39          | 14.1  |
| 3DOM/cluster | mm39          | 18.3  |
| 5DOM/3DOM    | mm39          | 0.8   |
| 5DOM/cluster | danRer11      | 8.7   |
| 3DOM/cluster | danRer11      | 7.5   |
| 5DOM/3DOM    | danRer11      | 1.2   |
| 5DOM         | mm39/danRer11 | 2.2   |
| 3DOM         | mm39/danRer11 | 3.3   |
| cluster      | mm39/danRer11 | 1.4   |
| assembly     | mm39/danRer11 | 1.9   |

| Assembly | Annotation source                                            | Release                                                                 |
|----------|--------------------------------------------------------------|-------------------------------------------------------------------------|
| danRer11 | NCBI RefSeq genes, curated subset                            | Annotation Release NCBI Danio rerio Annotation Release 106 (2019-10-28) |
| mm39     | NCBI RefSeq genes, curated subset (NM_*, NR_*, NP_* or YP_*) | Annotation Release NCBI RefSeq GCF_000001635.27-RS_2023_04 (2023-04-11) |

Hintermann\*, Bolt\* et al.

Table S2: Accession numbers for re-analysed data

| Name                        | SRA number  | Publication              | DOI                                                                                 |
|-----------------------------|-------------|--------------------------|-------------------------------------------------------------------------------------|
| CTCF_ChIP_E105_PT_rep1      | SRR17750150 | (Hintermann et al. 2022) | <a href="https://doi.org/10.1242/dev.200594">https://doi.org/10.1242/dev.200594</a> |
| Franke_CTCF_ChIP_24hpf_rep1 | SRR12435909 | (Franke et al. 2021)     | 10.1038/s41467-021-25604-5                                                          |
| Franke_CTCF_ChIP_24hpf_rep2 | SRR14670351 | (Franke et al. 2021)     | 10.1038/s41467-021-25604-5                                                          |
| Franke_CTCF_ChIP_48hpf_rep1 | SRR14670354 | (Franke et al. 2021)     | 10.1038/s41467-021-25604-5                                                          |
| Franke_CTCF_ChIP_48hpf_rep2 | SRR14670355 | (Franke et al. 2021)     | 10.1038/s41467-021-25604-5                                                          |
| Franke_48hpf_wt_rep1        | SRR12435867 | (Franke et al. 2021)     | 10.1038/s41467-021-25604-5                                                          |
| Franke_48hpf_wt_rep2        | SRR12435868 | (Franke et al. 2021)     | 10.1038/s41467-021-25604-5                                                          |
| Franke_24hpf_wt_rep1        | SRR14670388 | (Franke et al. 2021)     | 10.1038/s41467-021-25604-5                                                          |
| Franke_24hpf_wt_rep2        | SRR14670389 | (Franke et al. 2021)     | 10.1038/s41467-021-25604-5                                                          |
| Wike_24hpf_seq1             | SRR12044304 | (Wike et al. 2021)       | 10.1101/gr.269860.120                                                               |
| Wike_24hpf_seq2             | SRR12044305 | (Wike et al. 2021)       | 10.1101/gr.269860.120                                                               |
| Wike_24hpf_seq3             | SRR12044306 | (Wike et al. 2021)       | 10.1101/gr.269860.120                                                               |
| Wike_24hpf_seq4             | SRR12044307 | (Wike et al. 2021)       | 10.1101/gr.269860.120                                                               |
| Wike_24hpf_seq5             | SRR12044308 | (Wike et al. 2021)       | 10.1101/gr.269860.120                                                               |
| Wike_24hpf_seq6             | SRR12044309 | (Wike et al. 2021)       | 10.1101/gr.269860.120                                                               |

Hintermann\*, Bolt\* et al.

Table S3: Sequences for primers and guides

## ZEBRAFISH

### Genotyping primers

| Name             | Sequence (5' to 3')    |
|------------------|------------------------|
| 5DOM_WT_f        | GAAAATGGCTGGGCAGGACA   |
| 5DOM_WT_r        | GACGGTGTGTTCAATCGGGT   |
| 5DOM_Del_f       | AATGGCTGGGCAGGACATAC   |
| 5DOM_Del_r       | GTGGTCCTGTTGTGGAGCAT   |
| 3DOM_WT_f        | GACACACAATGACCCACAATTC |
| 3DOM_WT_r        | ACGGCACATTTGTGATGTTTAG |
| 3DOM_Del_f       | CCTTCAAACCTCAAGGCCCATC |
| 3DOM_Del_r       | CTCCCGATTTGCTGTAACAC   |
| evx2_f           | CGCACTGGCATTCTCTGTTTT  |
| evx2_r           | GGAAGTGTGTCGTTGTGGTGG  |
| zf_CsA_f         | CAGCCCGCAAAGCCTCATTTTA |
| zf_CsA_r         | GTGTCAACGAGAGGAGAAGGCT |
| zf_CsB_f         | ACCAGGAGAAACACCACACACA |
| zf_CsB_r         | TGACCAACTGATAACCCACCC  |
| zf_islandV_f     | CTCATTTGCGCCGCTGTCTTTA |
| zf_islandV_r     | GGTTAGATGTGGGGTTTGGGGA |
| zf_islandII_f    | AGCAAAGCCCGCTAATAGACA  |
| zf_islandII_r    | TGACGCGTGGGCTTAAAATCAC |
| hoxa13a_8_del_f  | GCCAAGGAGTTTGCCTTGTA   |
| hoxa13a_8_del_r  | TGACGACTTCCACACGTTTC   |
| hoxa13b_14_ins_f | GATTGACCCGGTGATGTTTC   |
| hoxa13b_14_ins_r | TACTGTTTCGAGCAAAA      |
| hoxd13a_f        | AAGCCGGTGTACATCAGGAG   |
| hoxd13a_r        | GTGGCCTTCCATTGTCAAAC   |

### crRNA

| Name          | Sequence                       |
|---------------|--------------------------------|
| hoxd13a_crRNA | CTGAGAGGATCCATTGCGAAACACCTGGG  |
| atp5g3a_crRNA | AACCATATCCACTCTTCAGGAGGTCATGTG |
| hoxd3a_crRNA  | TGATGCTGCACCCTAAATGG           |
| hnmpa3_crRNA  | ATAATCTAGTCATAGCTGGA           |



## MOUSE

### Genotyping primers

| primer name                                              | Sequence                      | Reference                          |
|----------------------------------------------------------|-------------------------------|------------------------------------|
| <b><i>Inv(Itga6-nsi)d11lac</i></b>                       |                               |                                    |
| Inv(Itga6-nsi)d11lac_WT_f                                | GCAAGCCACTTGAAACAACCTGTTAATGG | (Tschopp and Duboule 2011)         |
| Inv(Itga6-nsi)d11lac_WT_r                                | CCGTCCAATGTGCGTGTTTTCC        |                                    |
| Inv(Itga6-nsi)d11lac_Inv_f                               | GAGTTTCTCTTTGCTGTAATGAAGAGCTG |                                    |
| Inv(Itga6-nsi)d11lac_Inv_r                               | CCGTCCAATGTGCGTGTTTTCC        |                                    |
| <b><i>Inv(Itga6-attP)</i></b>                            |                               |                                    |
| Inv(nsi-itga6)d11lac_WT_f                                | GCAAGCCACTTGAAACAACCTGTTAATGG | (Schep et al. 2016)                |
| Inv(nsi-itga6)d11lac_WT_r                                | CCGTCCAATGTGCGTGTTTTCC        |                                    |
| Inv(nsi-itga6)d11lac_Inv_f                               | GAGTTTCTCTTTGCTGTAATGAAGAGCTG |                                    |
| Inv(nsi-itga6)d11lac_Inv_r                               | CCGTCCAATGTGCGTGTTTTCC        |                                    |
| <b><i>Del(HoxD)</i></b>                                  |                               |                                    |
| Del(HoxD)_WT_f                                           | GAGCCCGACGCATCGAGATAGC        | (Spitz et al. 2001)                |
| Del(HoxD)_WT_r                                           | CAAGGTCCTCAGCCTTAAGAGTGG      |                                    |
| Del(HoxD)_Del_f                                          | AGGGATCCGGAGCATACCACTG        |                                    |
| Del(HoxD)_Del_r                                          | CTCTCTCTACGAGGGAATGTGGAG      |                                    |
| <b><i>tgBAC(HoxD), tg(GT2), tg(islandE), tg(CsB)</i></b> |                               |                                    |
| tgLacZ_PCRb_f                                            | CCTGCTGATGAAGCAGAACA          | tgBAC(HoxD) in (Schep et al. 2016) |
| tgLacZ_PCRb_r                                            | CAGCGACCAGATGATCACAC          |                                    |
| <b><i>Del(Atf2-SB1)</i></b>                              |                               |                                    |
| Del(Atf2-SB1)_WT_f                                       | GACAATCGTATGCATGGCATACTCGG    | (Montavon et al. 2011)             |
| Del(Atf2-SB1)_WT_r                                       | GATAGGAGTGACATTCAGACACGGC     |                                    |
| Del(Atf2-SB1)_Del_f                                      | GTTTTCCAGTCACGACGTTG          |                                    |
| Del(Atf2-SB1)_Del_r                                      | GCCACTGGCCGAATATTACCTATTTTGTG |                                    |
| <b><i>Del(SB1-Rel5)</i></b>                              |                               |                                    |
| Del(SB1-Rel5)_WT_f                                       | GACAATCGTATGCATGGCATACTCGG    | (Montavon et al. 2011)             |
| Del(SB1-Rel5)_WT_r                                       | GATAGGAGTGACATTCAGACACGGC     |                                    |
| Del(SB1-Rel5)_Del_f                                      | CAGACTAGGCTTGCCCTACGG         |                                    |
| Del(SB1-Rel5)_Del_r                                      | CCTGCTGCAGGGGTTGGAG           |                                    |
| <b><i>Del(Rel5-Rel1)</i></b>                             |                               |                                    |
| Del(Rel5-Rel1)_WT_f                                      | CTAGAGAGTACAGCAATGACTTTTGGGC  | (Montavon et al. 2011)             |
| Del(Rel5-Rel1)_WT_r                                      | CAGACTAGGCTTGCCCTACGG         |                                    |
| Del(Rel5-Rel1)_Del_f                                     | ACGTGGAGTGGAGTGATGGTTG        |                                    |
| Del(Rel5-Rel1)_Del_r                                     | GGCTGCTTTGGACAATGCTGG         |                                    |

**RT-qPCR primers**

| Name     | Sequence                |
|----------|-------------------------|
| Hoxd13_F | AAGGATCAGCCACAGGGGTCCC  |
| Hoxd13_R | GTAGACGCACATGTCCGGCTGG  |
| Hoxd12_F | CTATGTGGGCTCGCTTCTGAA   |
| Hoxd12_R | GGCTCTCAGGTTGGAAAAGTAG  |
| Hoxd11_F | AAAAGACTCCAACCTCTCTCGGA |
| Hoxd11_R | AGACGGTCCCTGTTCA GTTTC  |
| Hoxd10_F | GCTGGTCCCCGAGTCTTGCCT   |
| Hoxd10_R | CCGGTGGCGTAGGTCTGACTCA  |
| Hoxd9_F  | CTCCACCCGGAAAAAGCGCTGT  |
| Hoxd9_R  | CGGTCCCGGTGAGGTACATGT   |
| Hoxd8_F  | TTCCCTGGATGAGACCACAAG   |
| Hoxd8_R  | CTAGGGTTTGAAGCGACTGT    |
| Tbp_F    | CCTTGTACCCTTACCAATGAC   |
| Tbp_R    | ACAGCCAAGATTCACGGTAGA   |

**Primers to clone transgenes**

| Name   | Sequence                          |
|--------|-----------------------------------|
| GT2_F  | tccggtcgacTGTCACCACCATCGACAAGT    |
| GT2_R  | tccggtcgacATGCATTTACCGTCTTTC      |
| IsE_F1 | ccccctcgagCTCAAGCCAGACAGGGATGATTA |
| IsE_R1 | cgataccgtcgacGTGGGCTGTTTACTGGCAA  |
| CsB_F1 | ccccctcgagAACTGCAGGGCTTAAACCGAT   |
| CsB_R1 | cgataccgtcgacTGGGCCCAAGTGCCTTAATC |
